# Supplementary material for: Pros and Cons of Pharmacological Manipulation of cGMP-PDEs in the Prevention and Treatment of Breast Cancer
Source: MDPI journal article supplement (doi:10.3390/ijms23010262), 2021-12-27
Supplement: s1 [file s1]

Supplementary Table S1. Tissue distribution, role and relative inhibitors of PDEs.

| PDE   | Substrate                                                           | Tissue expression                                                                              | Role                                                                                                                                   | Inhibitors                                                                                                                 | References                                                                                                                                                                                                                                                                                                            |
|-------|---------------------------------------------------------------------|------------------------------------------------------------------------------------------------|----------------------------------------------------------------------------------------------------------------------------------------|----------------------------------------------------------------------------------------------------------------------------|-----------------------------------------------------------------------------------------------------------------------------------------------------------------------------------------------------------------------------------------------------------------------------------------------------------------------|
| PDE1  | cAMP/cGMP dual specificity. Ca <sup>2+</sup> /Calmodulin-regulated. | Heart, brain, macrophages, lung, testis, smooth muscle                                         | Vascular smooth muscle contraction and proliferation, neuronal signaling, sperm function.                                              | KS-505a, Vinpocetine, IC86.340, SCH51866                                                                                   | (Beaumont et al., 2014; Dunkerly-Eyring & Kass, 2020; Golshiri et al., 2020; Lefièvre et al., 2002; Orhan et al., 2021; Ozaki et al., 2018; Samidurai et al., 2021; Sharma et al., 2006; Wennogle et al., 2017)                                                                                                       |
| PDE2  | cAMP/cGMP dual specificity. cGMP-stimulated                         | Adrenal gland, macrophages, brain, heart, lung, liver, endothelium, platelets                  | Aldosterone secretion, neuronal signaling, inflammatory-mediated endothelial cell function, regulation of calcium channel in the heart | BAY60-7550, IC933, Oxindole, PDP, EHNA                                                                                     | (Bizzi et al., 2019; Bubb et al., 2014; Chambers et al., 2006; Sadek et al., 2020; Sadhu et al., 1999; Schobesberger et al., 2020; Szarek & Stratakis, 2014; Y.-W. Wang et al., 2021; Weber et al., 2017; Zhang et al., 2017; M.-J. Zhu et al., 2020)                                                                 |
| PDE3  | cAMP/cGMP dual specificity. cGMP-inhibited.                         | Heart, lung, liver, pancreas, platelets, adipose tissue, inflammatory and immune cells         | Vascular smooth muscle contraction, renin release, Insulin signaling, cell proliferation, platelet aggregation, cardiac contractility  | Cilostamide, Tolafentrine, Enoximone, Milrinone, Siguazodan, K134, Olprinone, Trequinsin                                   | (Bejaoui et al., 2018; Beute et al., 2021; Coenen et al., 2021; de Havenon et al., 2021; D. Singh et al., 2021; Vinogradova & Lakatta, 2021; Wójcik-Pszczola et al., 2021)                                                                                                                                            |
| PDE4  | cAMP-specific                                                       | Heart, Sertoli cells, kidney, brain, liver, lung, inflammatory and immune cells                | Vascular smooth muscle contraction and proliferation, immune cell activation, cardiac contractility, neuronal signaling                | Rolipram, Roflumilast, Ro20-1724, AWD12281, GSK256066, CBU91, Cilomilast, Denbufylline, Apremilast, Arofylline, Difamilast | (Dong et al., 2021; KleinJan, 2021; Levallet et al., 2008; Ookawara & Nio, 2021; Park et al., 2021; Saeki et al., 2021; Vilhena et al., 2021)                                                                                                                                                                         |
| PDE5  | cGMP-specific                                                       | Lung, brain, heart, platelets, penis, vascular smooth muscle, stomach and colon                | Vascular smooth muscle contraction, neuronal signaling, platelet aggregation                                                           | Sildenafil, Zaprinst, Taldanafil, Exisulind, Vardenafil, Dipyridamole, Mirodenafil, E402, DA8159                           | (Abdel-Halim et al., 2021; AboYoussef et al., 2021; Cruz-Burgos et al., 2021; Haider et al., 2021; Hoeper et al., 2021; Iwasaki et al., 2021; Kang & Song, 2021; Kopanitsa et al., 2021; Roy et al., 2021; Sakalis et al., 2021; G. Wang et al., 2021; A. Webb et al., 2021; Zhong et al., 2021; G. Zhu et al., 2021) |
| PDE6  | cGMP-specific                                                       | Photoreceptor                                                                                  | Phototransduction                                                                                                                      | Dipyridamole, Avanafil, Zaprinst, Udenafil                                                                                 | (Arora et al., 2021; Cote et al., 2021; Leinonen et al., 2021)                                                                                                                                                                                                                                                        |
| PDE7  | cAMP-specific                                                       | Skeletal muscle, heart, kidney, brain, pancreas, T-lymphocytes, liver, testis                  | Cognitive function, immune cell activation                                                                                             | BRL-50481, ASB16165, IC242, Dipyridamole, GRMS-55                                                                          | (Y. Chen et al., 2020, 2021; Goto et al., 2010; Hayashida et al., 2021; R. Lee et al., 2002; Świerczek et al., 2021)                                                                                                                                                                                                  |
| PDE8  | cAMP-selective                                                      | Testis, eye, liver, skeletal muscle, heart, kidney, thyroid, ovary, brain, immune cells, colon | Immune cell activation, testis function, production of thyroid hormones                                                                | Dipyridamole, PF 04957325                                                                                                  | (Epstein et al., 2021; Lounas et al., 2019; Mansuri et al., 2020; Shimizu-Albergine et al., 2012; Tulsian et al., 2021; H. Wang et al., 2008)                                                                                                                                                                         |
| PDE9  | cGMP-specific                                                       | Kidney, liver, lung, brain, heart, prostate, spleen                                            | Neuronal signaling                                                                                                                     | PF04447943, BAY 73-6691, WYQ C28L, SCH51866, CRD-733                                                                       | (Ceddia et al., 2021; da Silva et al., 2013; Diederen et al., 2007; X.-F. Huang et al., 2018; Rana et al., 2021; Ribauda et al., 2021; Richards et al., 2021; Wu et al., 2021; Xiao et al., 2021)                                                                                                                     |
| PDE10 | cAMP/cGMP dual specificity                                          | Heart, thyroid, testis, brain                                                                  | Cognitive functions                                                                                                                    | Dipyridamole, PQ-10, Papaverine, MP-10, TP-10, ADT 061                                                                     | (K. J. Lee et al., 2021; Piazza et al., 2020; Titulaer et al., 2019; Y.-F. Yu et al., 2020; Zagorska et al., 2018; Zagórska, 2020)                                                                                                                                                                                    |
| PDE11 | cAMP/cGMP dual specificity                                          | Skeletal muscle, prostate, kidney, liver, pituitary gland                                      | Sperm development and function                                                                                                         | none                                                                                                                       | (Pilarzyk et al., 2019; Seftel, 2005; Smith et al., 2021; Wayman et al., 2005)                                                                                                                                                                                                                                        |
